# Supplementary material for: Heterobimetallic metallation studies of N,N-dimethylphenylethylamine (DMPEA): benzylic C–H bond cleavage/dimethylamino capture or intact DMPEA complex
Source: Royal Society of Chemistry journal article supplement (doi:10.1039/c5dt00247h), 2015-01-01
Supplement: c5dt00247h1.pdf [file c5dt00247h1.pdf]

**Heterobimetallic metallation studies of *N,N*-dimethylphenylethylamine (DMPEA) : benzylic C-H bond cleavage/dimethylamino capture or intact DMPEA complex†‡**

**Supporting Information**

**Alan R. Kennedy, Robert E. Mulvey,\* Donna L. Ramsay,\* and Stuart D. Robertson**

*WestCHEM, Department of Pure and Applied Chemistry, University of Strathclyde, Glasgow, G1 1XL. E-mail: [r.e.mulvey@strath.ac.uk](mailto:r.e.mulvey@strath.ac.uk)*

## Table of contents

### Synthesis of Zn(TMP)<sub>2</sub>

- Figure S1. <sup>1</sup>H NMR spectrum of [(TMEDA)Na(TMP)(NMe<sub>2</sub>)Zn(Bu<sup>t</sup>)] **3** in C<sub>6</sub>D<sub>12</sub> solution.
- Figure S2. <sup>13</sup>C NMR spectrum of [(TMEDA)Na(TMP)(NMe<sub>2</sub>)Zn(Bu<sup>t</sup>)] **3** in C<sub>6</sub>D<sub>12</sub> solution.
- Figure S3. <sup>1</sup>H NMR spectrum of [(PMDETA)Li(NMe<sub>2</sub>)Zn(Bu<sup>t</sup>)<sub>2</sub>] **4** in C<sub>6</sub>D<sub>12</sub> solution.
- Figure S4. <sup>13</sup>C NMR spectrum of [(PMDETA)Li(NMe<sub>2</sub>)Zn(Bu<sup>t</sup>)<sub>2</sub>] **4** in C<sub>6</sub>D<sub>12</sub> solution.
- Figure S5. <sup>7</sup>Li spectrum of [(PMDETA)Li(NMe<sub>2</sub>)Zn(Bu<sup>t</sup>)<sub>2</sub>] **4** in C<sub>6</sub>D<sub>12</sub> solution.
- Figure S6. <sup>1</sup>H NMR spectrum of [(THF)Li(TMP)(NMe<sub>2</sub>)Al(Bu<sup>i</sup>)<sub>2</sub>] **5** in C<sub>6</sub>D<sub>12</sub> solution.
- Figure S7. <sup>13</sup>C NMR spectrum of [(THF)Li(TMP)(NMe<sub>2</sub>)Al(Bu<sup>i</sup>)<sub>2</sub>] **5** in C<sub>6</sub>D<sub>12</sub> solution.
- Figure S8. <sup>7</sup>Li spectrum of [(THF)Li(TMP)(NMe<sub>2</sub>)Al(Bu<sup>i</sup>)<sub>2</sub>] **5** in C<sub>6</sub>D<sub>12</sub> solution.
- Figure S9. <sup>1</sup>H NMR spectrum of [DMPEA·Li(TMP)Zn(Me)<sub>2</sub>] **6** in C<sub>6</sub>D<sub>6</sub> solution.
- Figure S10. <sup>13</sup>C NMR spectrum of [DMPEA·Li(TMP)Zn(Me)<sub>2</sub>] **6** in C<sub>6</sub>D<sub>6</sub> solution.
- Figure S11. <sup>7</sup>Li NMR spectrum of [DMPEA·Li(TMP)Zn(Me)<sub>2</sub>] **6** in C<sub>6</sub>D<sub>6</sub> solution.
- Figure S12. <sup>1</sup>H NMR spectrum of [DMPEA·Li(TMP)Zn(Me)<sub>2</sub>] **6** in C<sub>6</sub>D<sub>12</sub> solution.
- Figure S13. <sup>13</sup>C NMR spectrum of [DMPEA·Li(TMP)Zn(Me)<sub>2</sub>] **6** in C<sub>6</sub>D<sub>12</sub> solution.
- Figure S14. <sup>7</sup>Li NMR spectrum of [DMPEA·Li(TMP)Zn(Me)<sub>2</sub>] **6** in C<sub>6</sub>D<sub>12</sub> solution.
- Figure S15. <sup>1</sup>H NMR spectrum of [DMPEA·Li(TMP)Zn(Me)<sub>2</sub>] **6** in d<sub>8</sub>-toluene solution.
- Figure S16. <sup>7</sup>Li NMR spectrum of [DMPEA·Li(TMP)Zn(Me)<sub>2</sub>] **6** in d<sub>8</sub>-toluene solution.
- Figure S17. <sup>1</sup>H NMR spectrum in C<sub>6</sub>D<sub>6</sub> solution of crystals of **6** dissolved in THF solution showing the emergence of a new NMe<sub>2</sub> resonance (at 3 ppm) resulting from the metallation and subsequent β-elimination of DMPEA.

**Synthesis of Zn(TMP)<sub>2</sub>:** TMP(H) (6.8 mL, 40 mmol) was added to hexane (40 mL) and the solution cooled to 0°C before *n*BuLi (25 mL, 1.6 M in hexanes, 40 mmol) was introduced. The resulting yellow suspension was stirred for 1 hour before all the solvent was removed *in vacuo*. ZnCl<sub>2</sub> (2.72 g, 20 mmol) was then added followed by diethyl ether (50 mL). The suspension was then left to stir for 2 days after which the ether was removed *in vacuo* and replaced by hexane (100 mL). The suspension was then filtered and the solid rinsed with hexane (80 mL). The solvent was then removed *in vacuo* to provide the pale yellow solid (yield: 4.0 g, 58%).

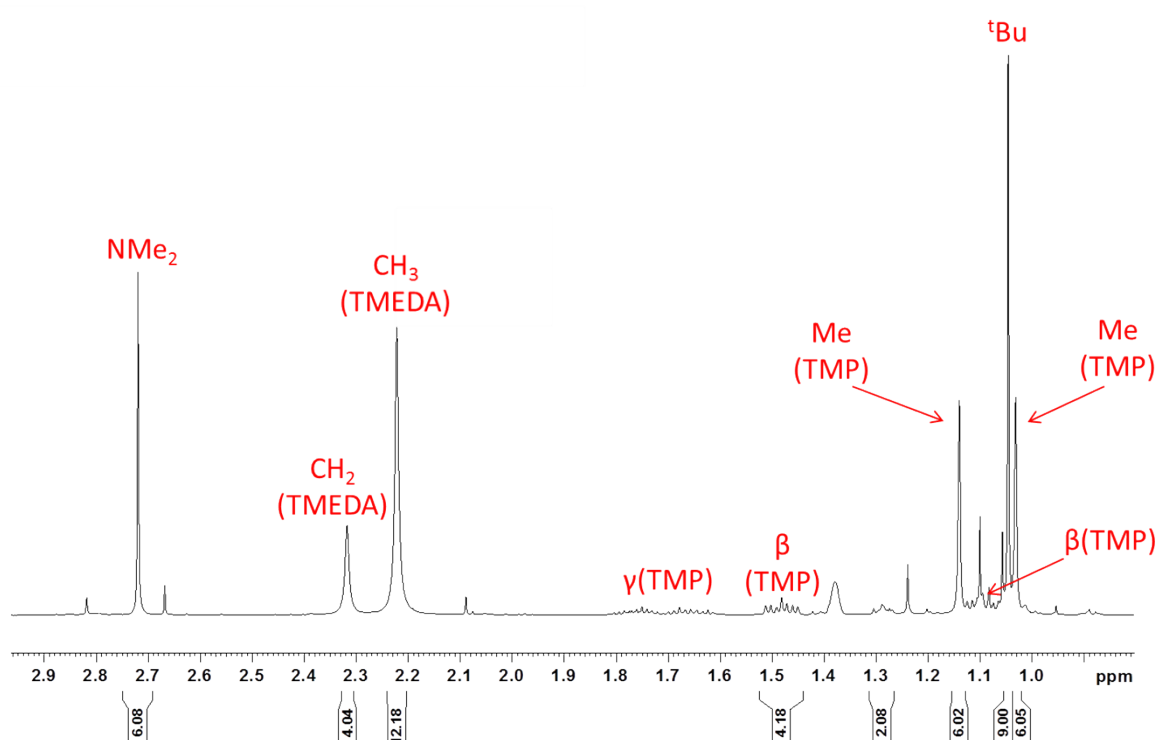

Figure S1. <sup>1</sup>H NMR spectrum of [(TMEDA)Na(TMP)(NMe<sub>2</sub>)Zn(Bu<sup>t</sup>)] **3** in C<sub>6</sub>D<sub>12</sub> solution.

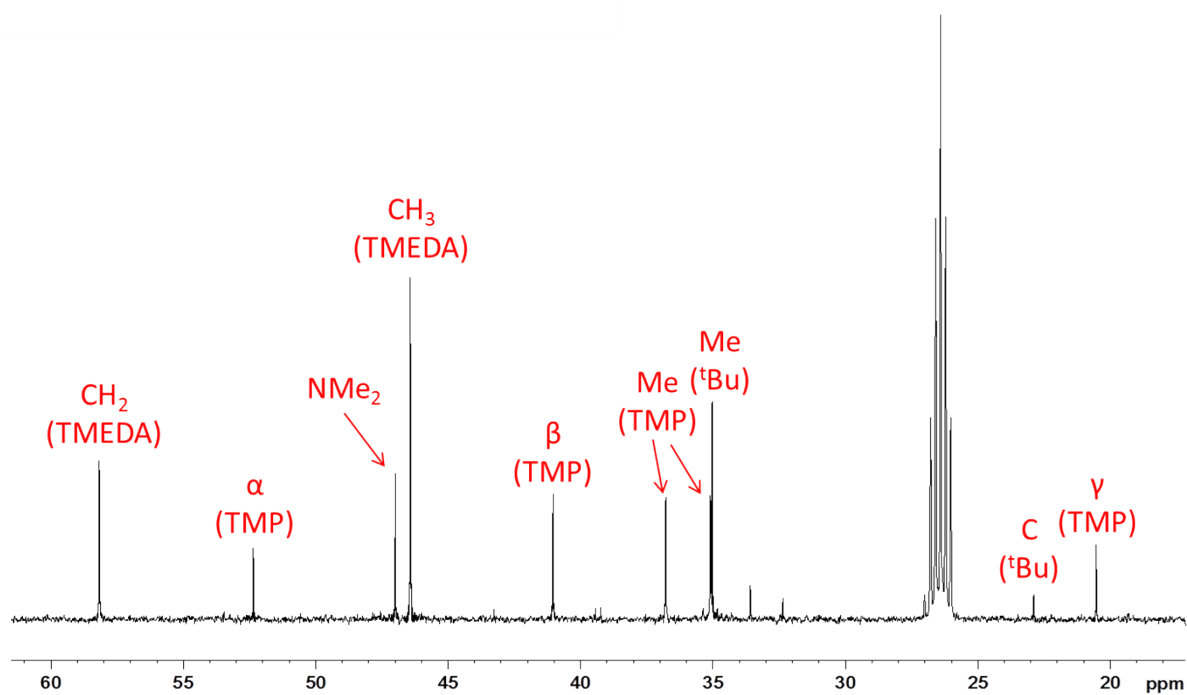

Figure S2.  $^{13}\text{C}$  NMR spectrum of  $[(\text{TMEDA})\text{Na}(\text{TMP})(\text{NMe}_2)\text{Zn}(\text{Bu}')_2]$  **3** in  $\text{C}_6\text{D}_{12}$  solution.

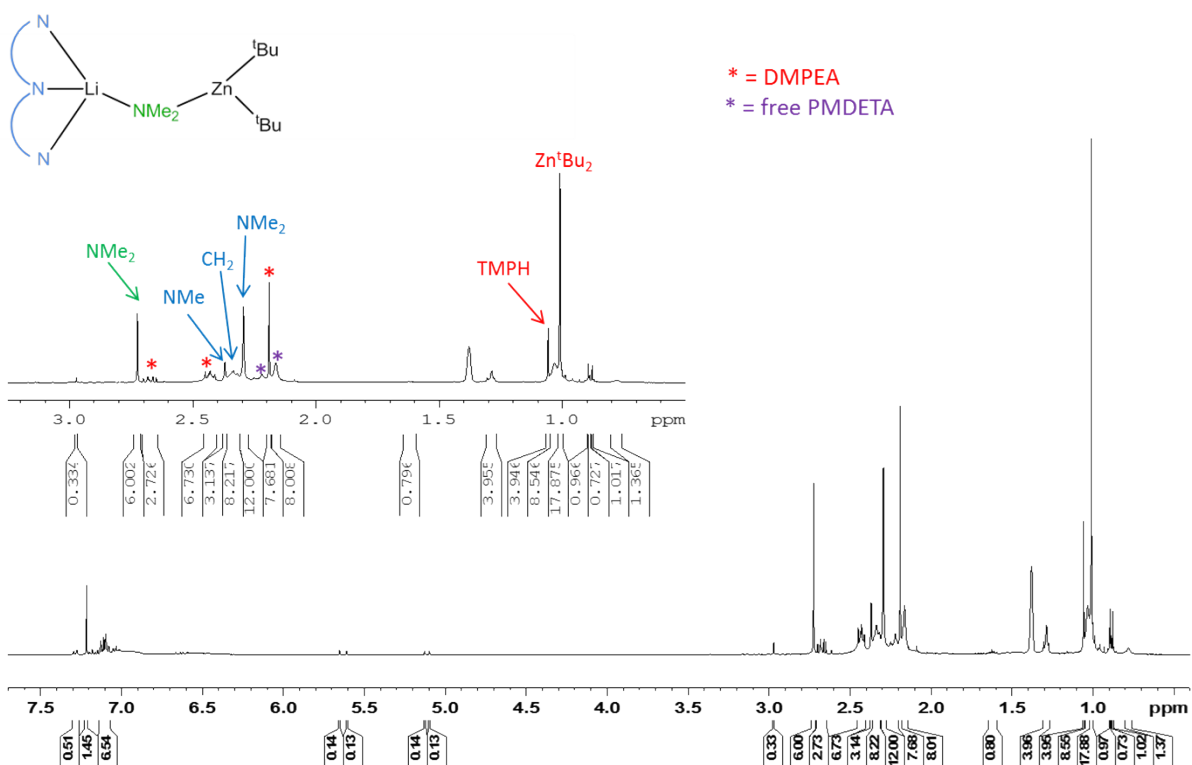

Figure S3.  $^1\text{H}$  NMR spectrum of  $[(\text{PMDETA})\text{Li}(\text{NMe}_2)\text{Zn}(\text{Bu}')_2]$  **4** in  $\text{C}_6\text{D}_{12}$  solution.

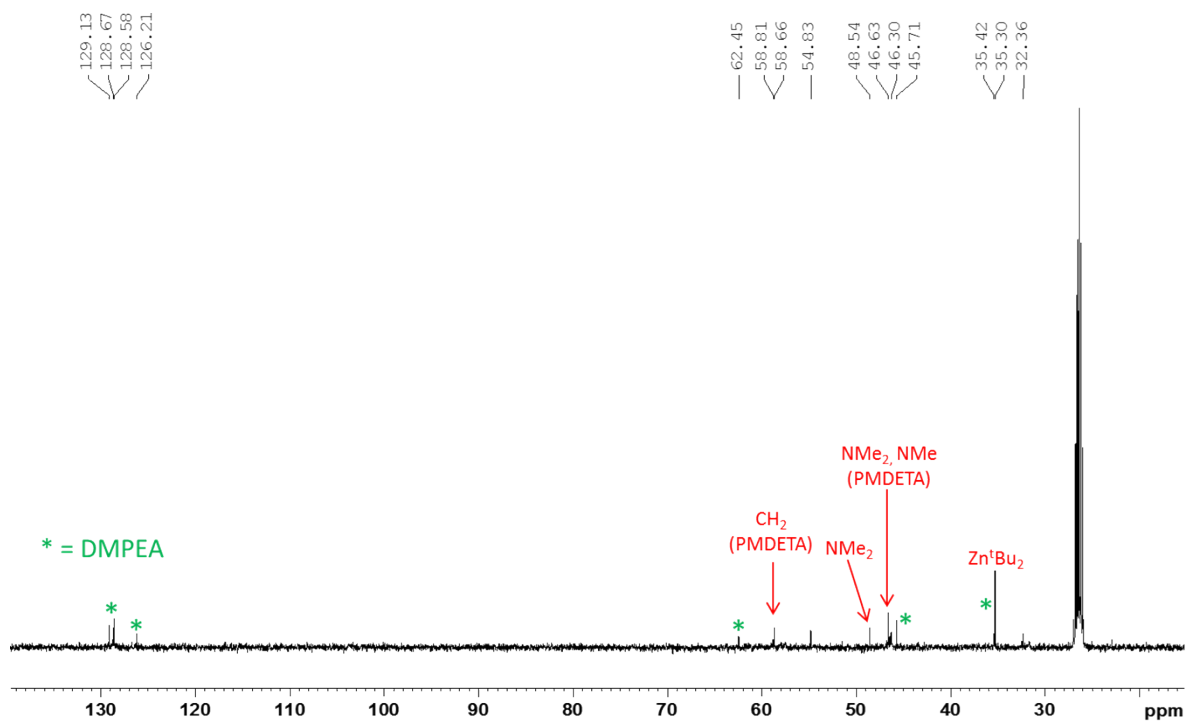

Figure S4.  $^{13}\text{C}$  NMR spectrum of  $[(\text{PMDETA})\text{Li}(\text{NMe}_2)\text{Zn}(\text{Bu}')_2]$  **4** in  $\text{C}_6\text{D}_{12}$  solution.

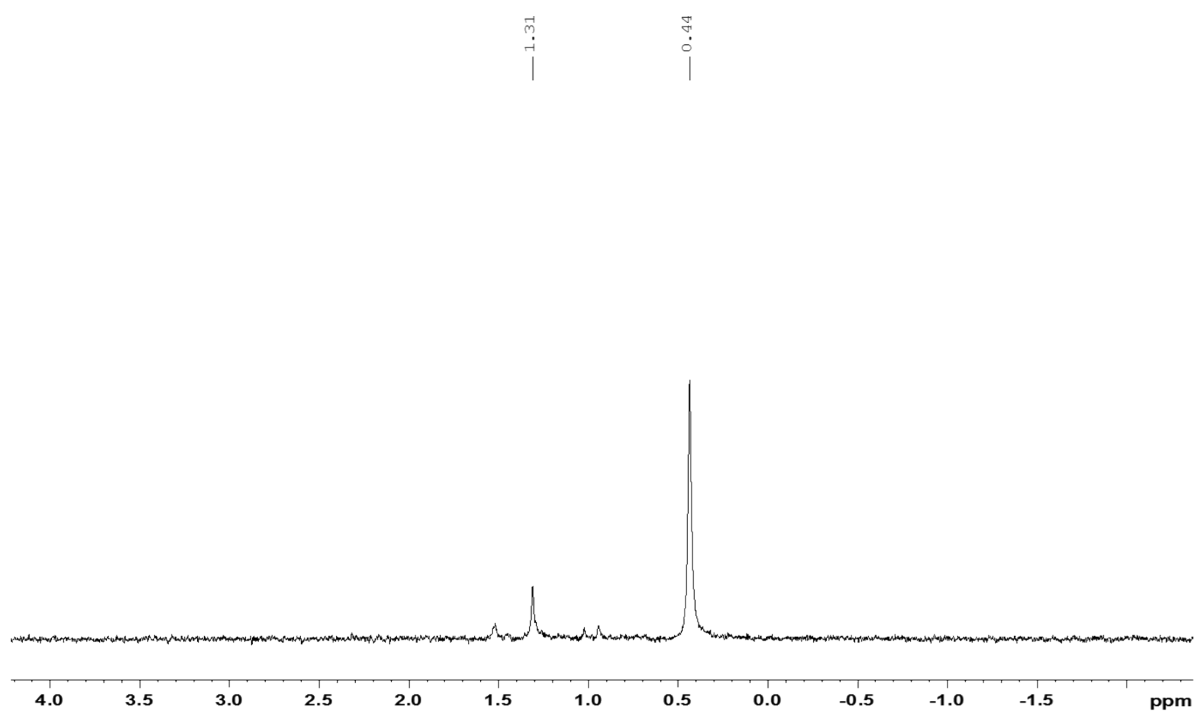

Figure S5.  $^7\text{Li}$  spectrum of  $[(\text{PMDETA})\text{Li}(\text{NMe}_2)\text{Zn}(\text{Bu}')_2]$  **4** in  $\text{C}_6\text{D}_{12}$  solution with an unidentified impurity at 1.31 ppm.

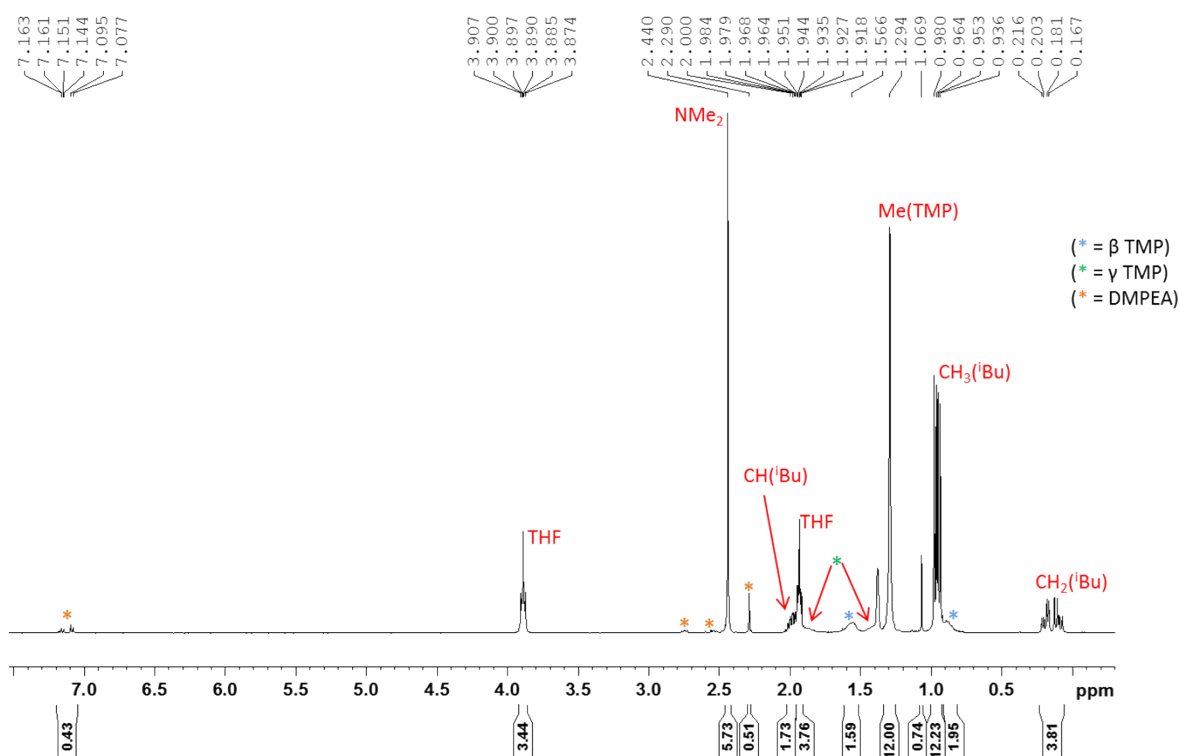

Figure S6.  $^1\text{H}$  NMR spectrum of  $[(\text{THF})\text{Li}(\text{TMP})(\text{NMe}_2)\text{Al}(\text{Bu}^i)_2]$  **5** in  $\text{C}_6\text{D}_{12}$  solution.

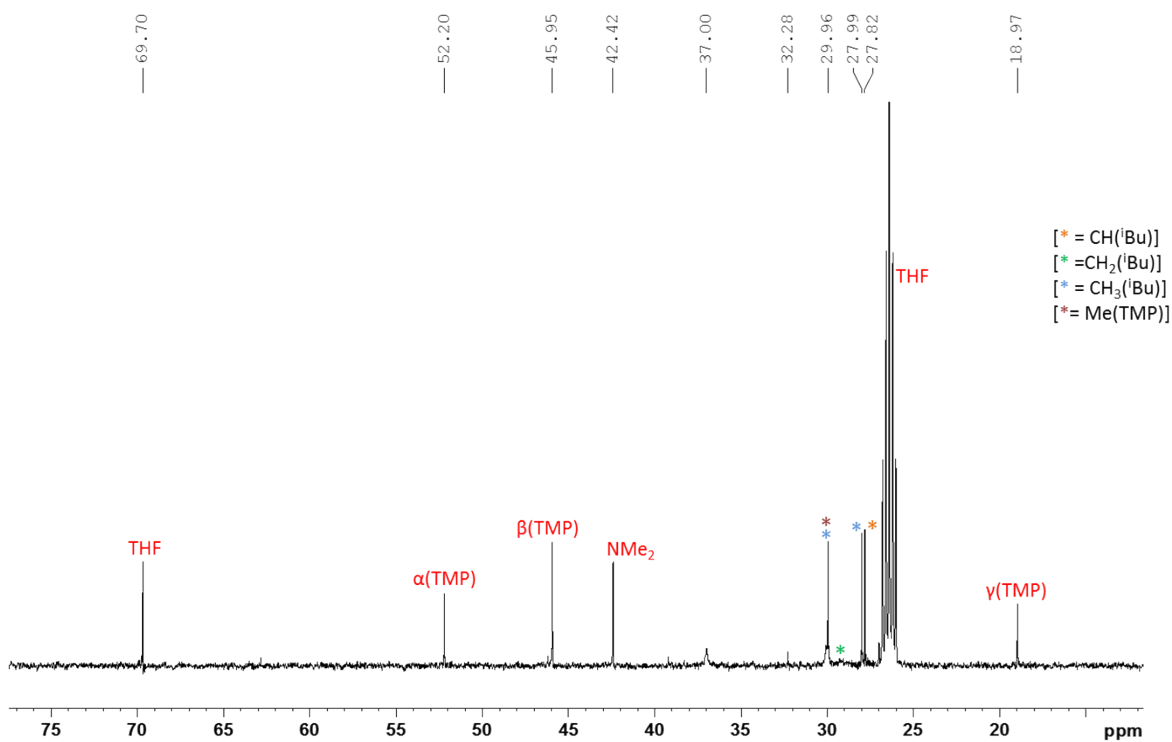

Figure S7.  $^{13}\text{C}$  NMR spectrum of  $[(\text{THF})\text{Li}(\text{TMP})(\text{NMe}_2)\text{Al}(\text{Bu}^i)_2]$  **5** in  $\text{C}_6\text{D}_{12}$  solution.

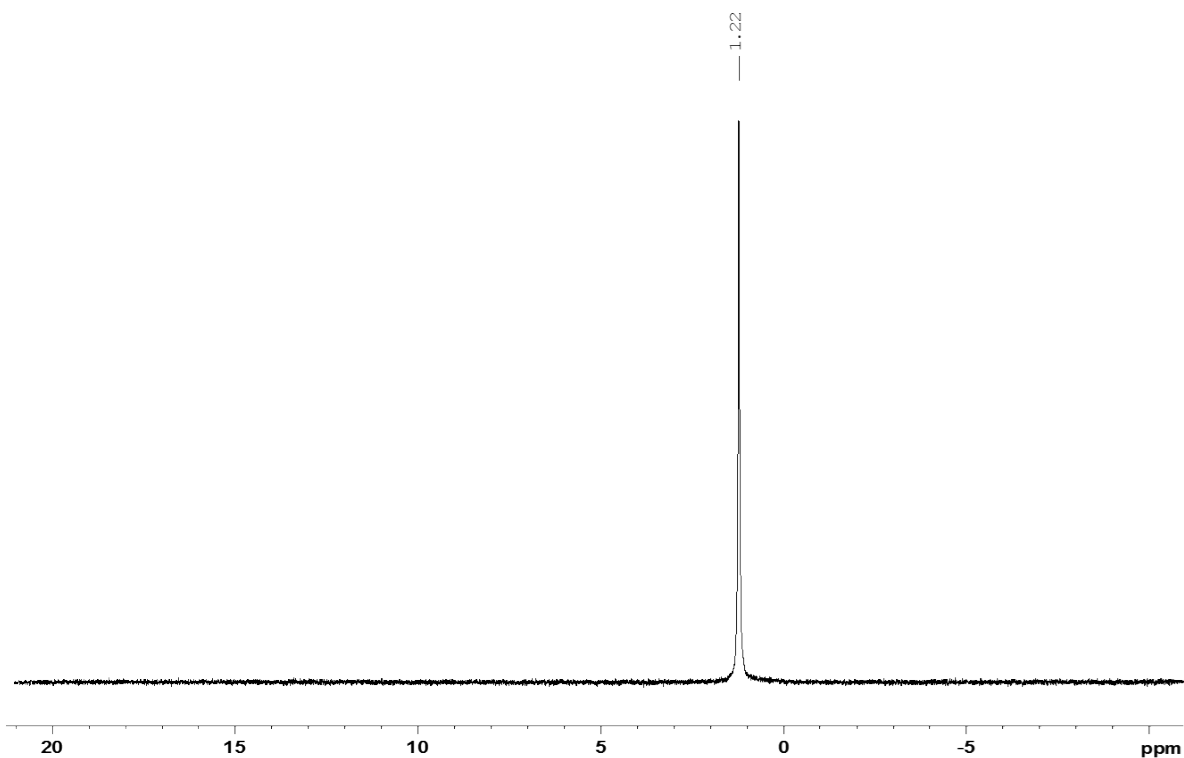

Figure S8.  $^7\text{Li}$  spectrum of  $[(\text{THF})\text{Li}(\text{TMP})(\text{NMe}_2)\text{Al}(\text{Bu}^t)_2]$  **5** in  $\text{C}_6\text{D}_{12}$  solution.

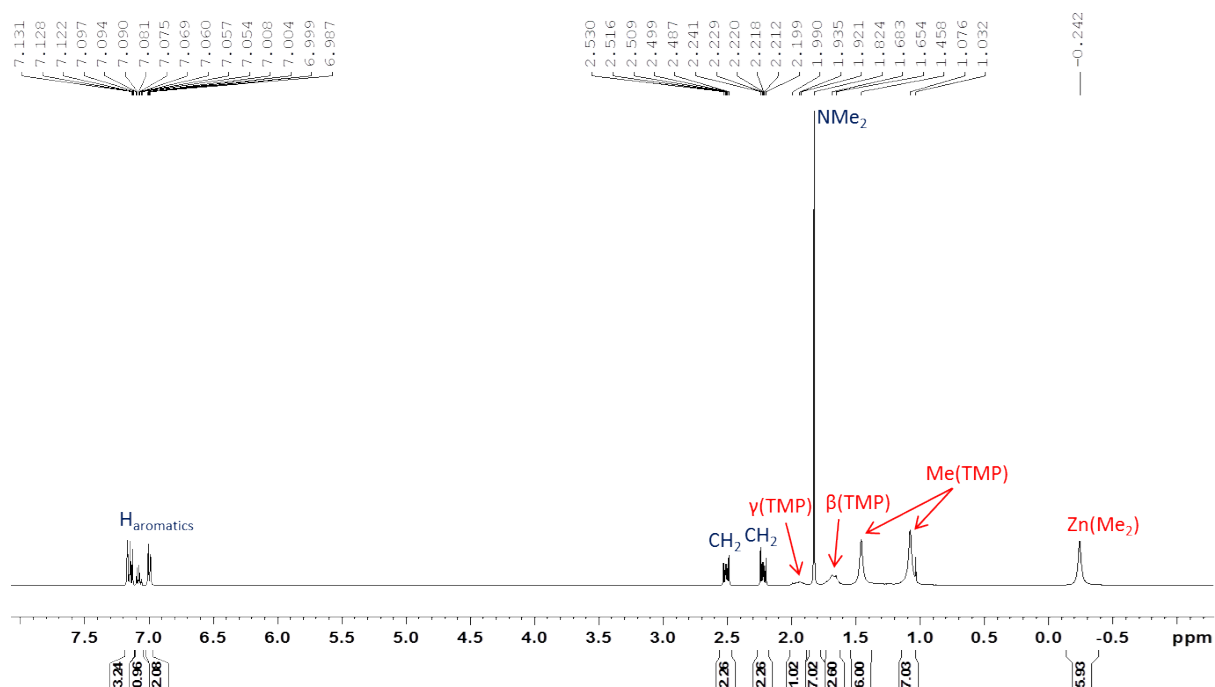

Figure S9.  $^1\text{H}$  NMR spectrum of  $[\text{DMPEA} \cdot \text{Li}(\text{TMP})\text{Zn}(\text{Me})_2]$  **6** in  $\text{C}_6\text{D}_6$  solution.

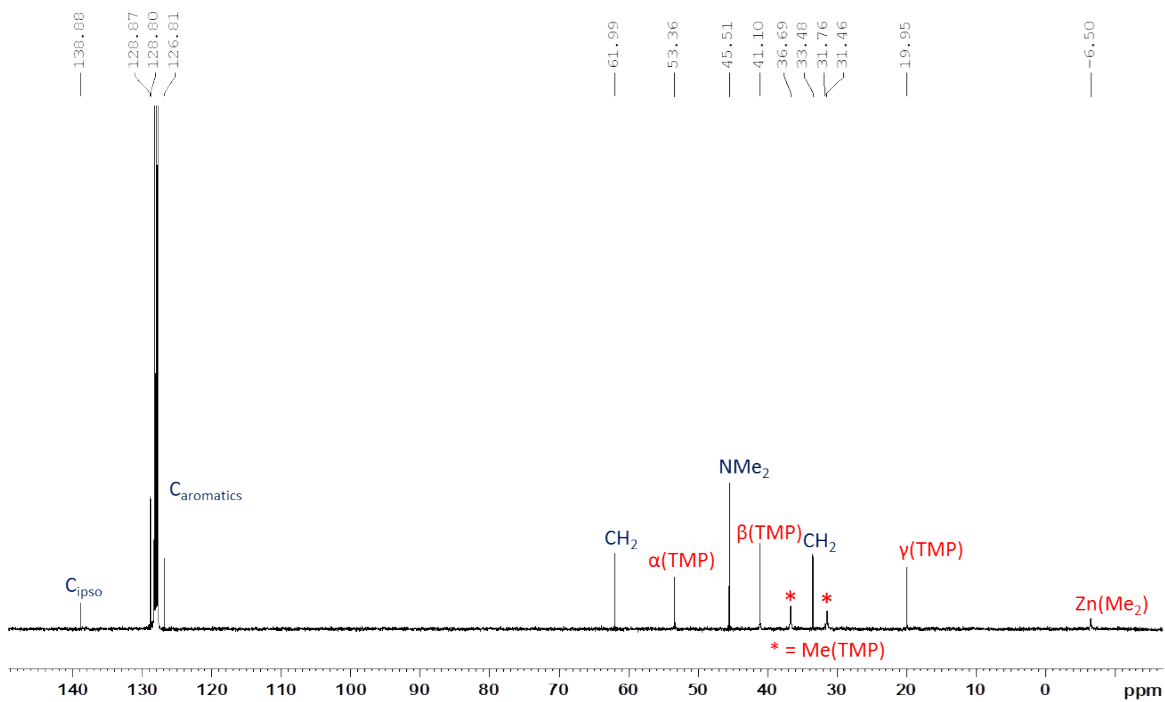

Figure S10.  $^{13}\text{C}$  NMR spectrum of  $[\text{DMPEA}\cdot\text{Li}(\text{TMP})\text{Zn}(\text{Me})_2]$  **6** in  $\text{C}_6\text{D}_6$  solution.

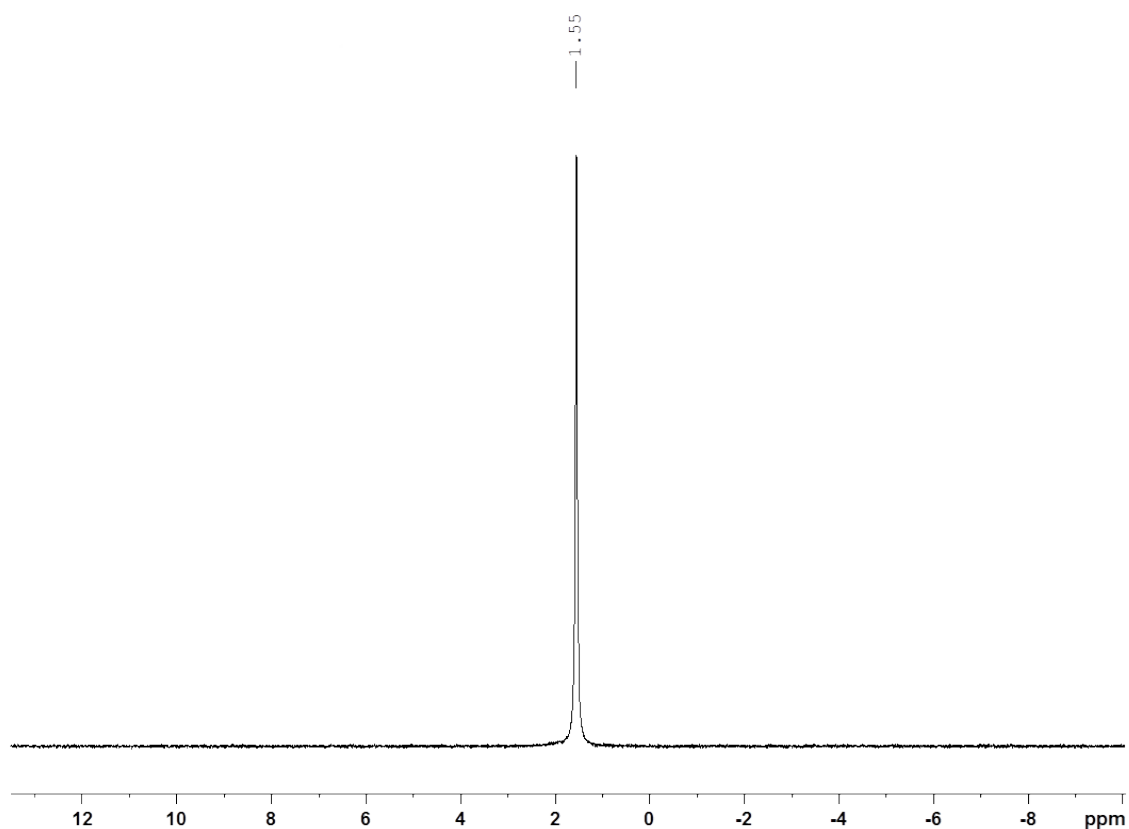

Figure S11.  $^7\text{Li}$  NMR spectrum of  $[\text{DMPEA}\cdot\text{Li}(\text{TMP})\text{Zn}(\text{Me})_2]$  **6** in  $\text{C}_6\text{D}_6$  solution.



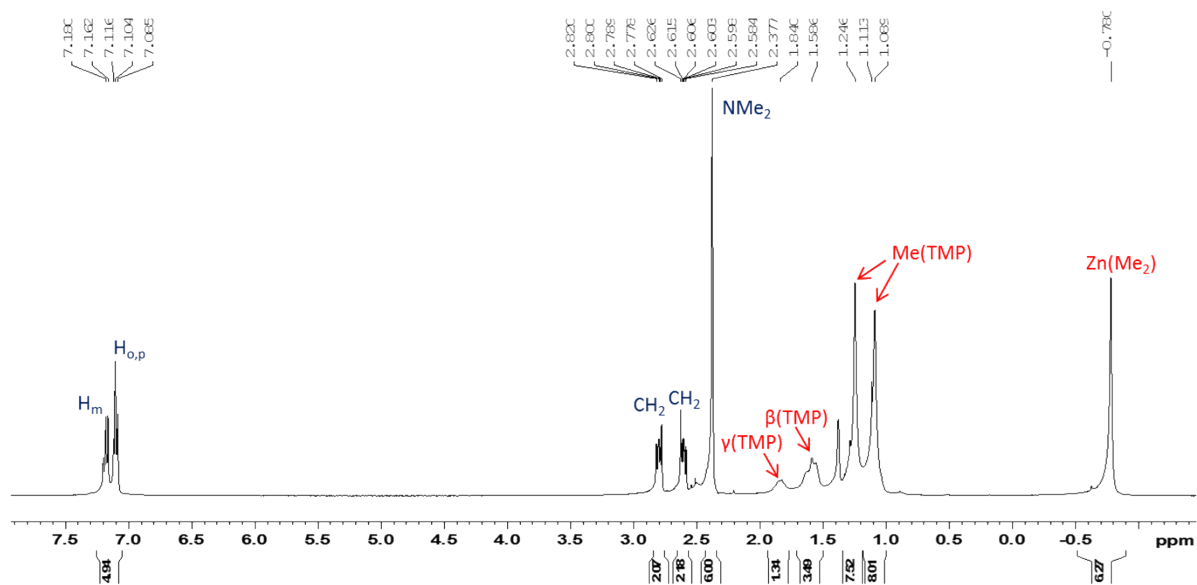

Figure S12.  $^1\text{H}$  NMR spectrum of  $[\text{DMPEA}\cdot\text{Li}(\text{TMP})\text{Zn}(\text{Me})_2]$  **6** in  $\text{C}_6\text{D}_{12}$  solution.

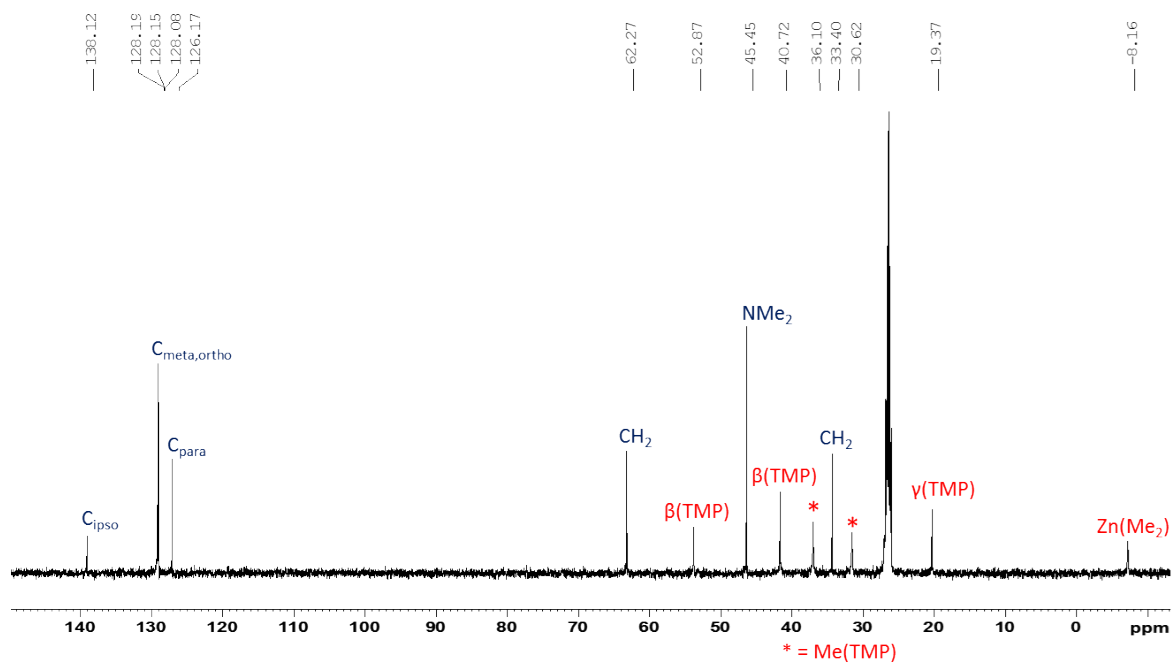

Figure S13.  $^{13}\text{C}$  NMR spectrum of  $[\text{DMPEA}\cdot\text{Li}(\text{TMP})\text{Zn}(\text{Me})_2]$  **6** in  $\text{C}_6\text{D}_{12}$  solution.

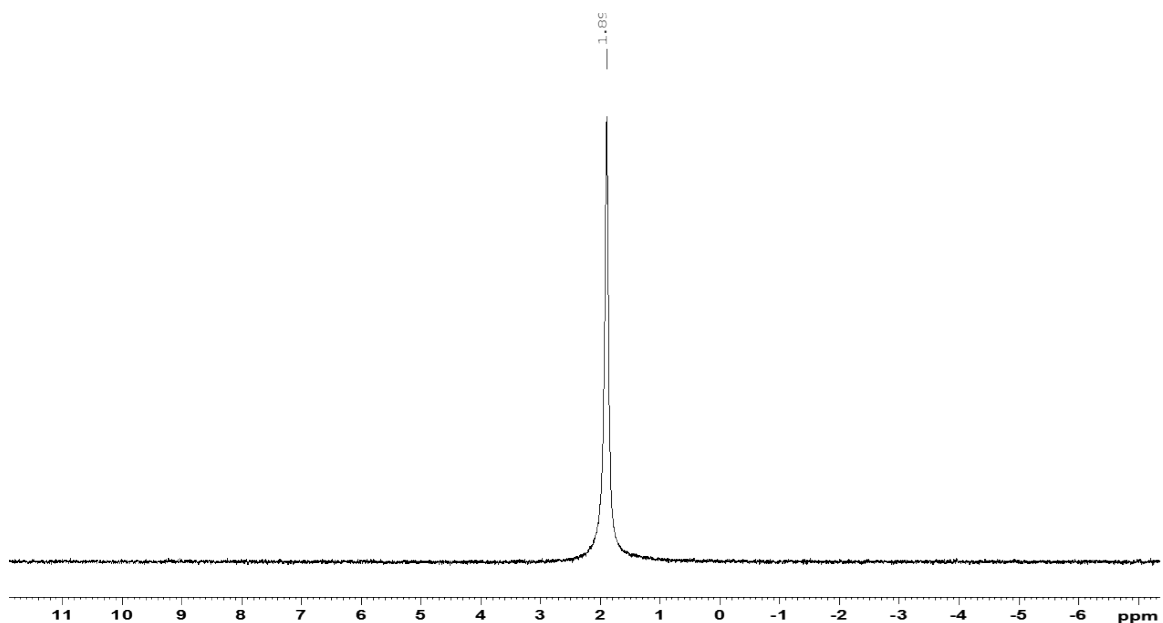

Figure S14.  $^7\text{Li}$  NMR spectrum of  $[\text{DMPEA}\cdot\text{Li}(\text{TMP})\text{Zn}(\text{Me})_2]$  **6** in  $\text{C}_6\text{D}_{12}$  solution.

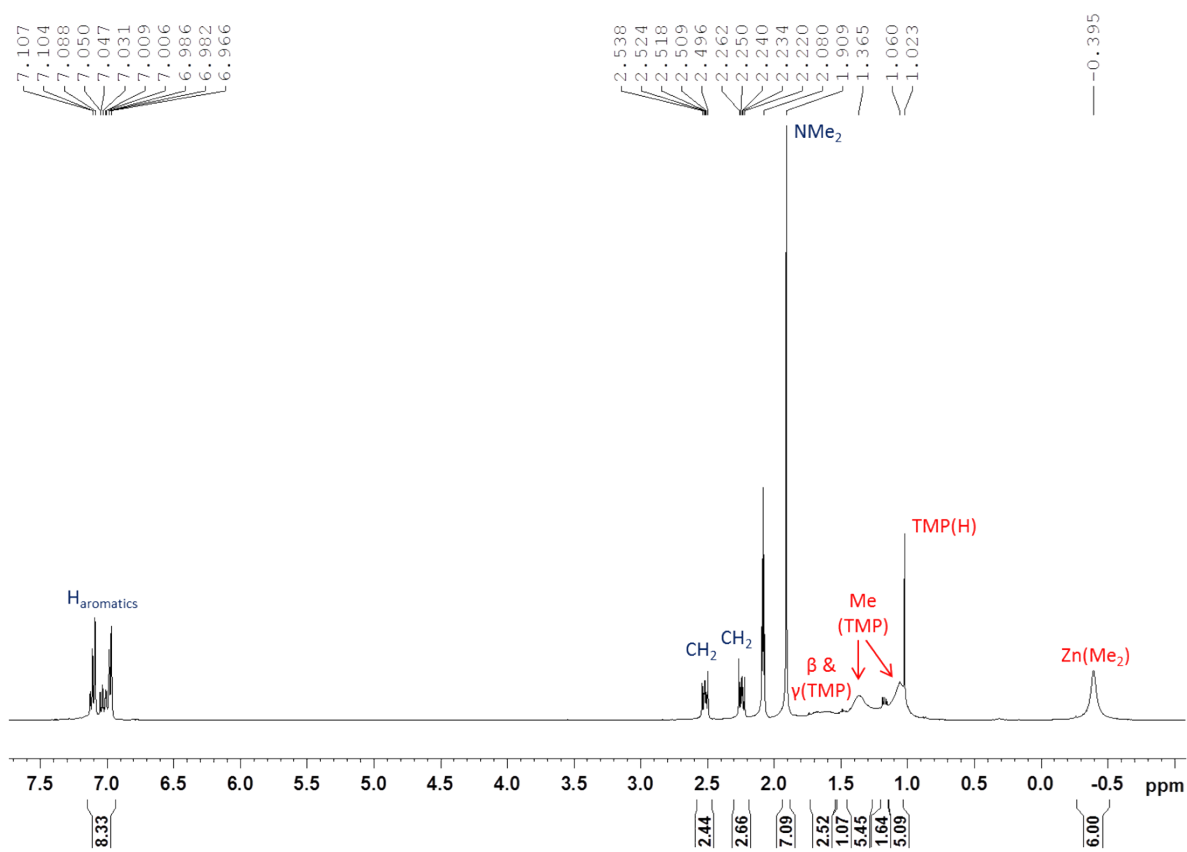

Figure S15.  $^1\text{H}$  NMR spectrum of  $[\text{DMPEA}\cdot\text{Li}(\text{TMP})\text{Zn}(\text{Me})_2]$  **6** in  $d_8$ -toluene solution.

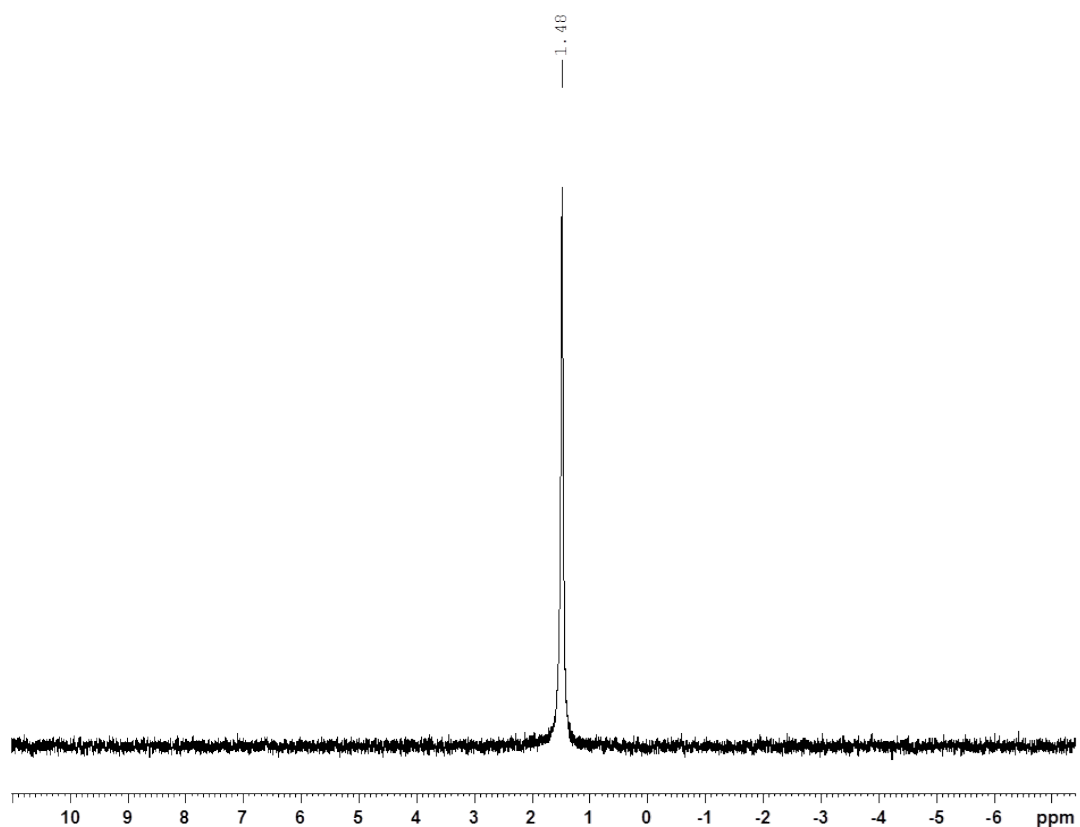

Figure S16.  $^7\text{Li}$  NMR spectrum of  $[\text{DMPEA}\cdot\text{Li}(\text{TMP})\text{Zn}(\text{Me})_2]$  **6** in  $d_8$ -toluene solution.

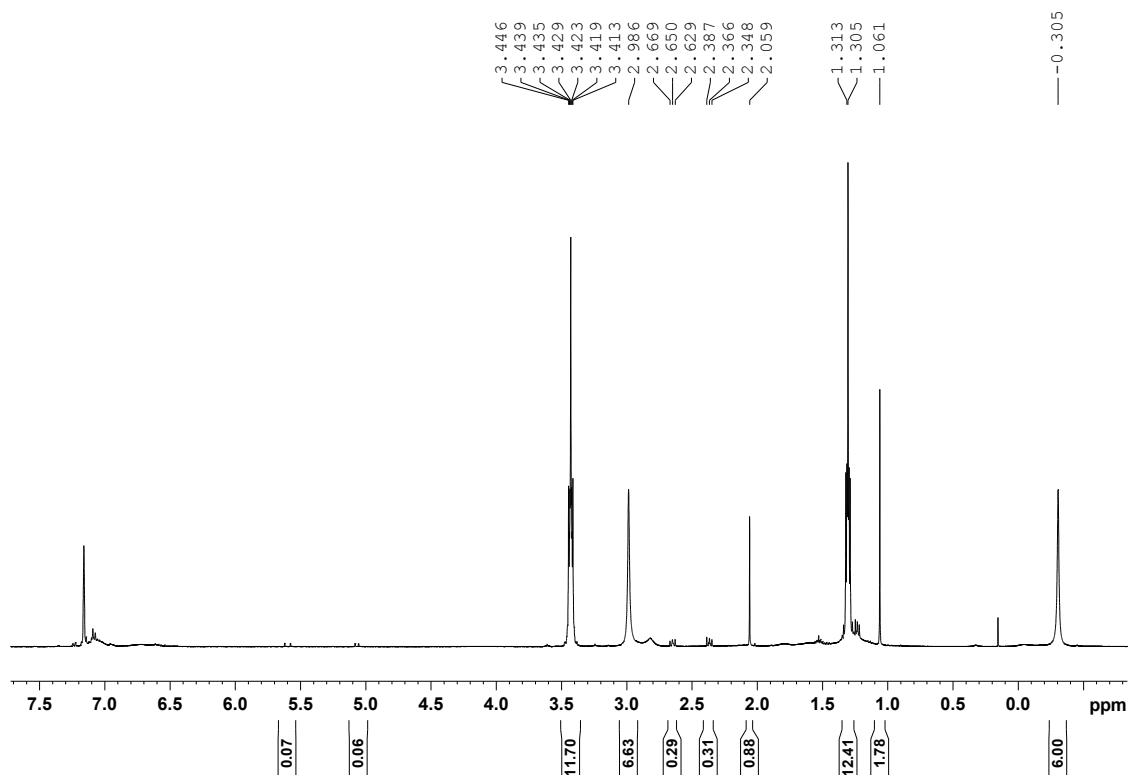

Figure S17.  $^1\text{H}$  NMR spectrum in  $\text{C}_6\text{D}_6$  solution of crystals of  $[\text{DMPEA}\cdot\text{Li}(\text{TMP})\text{Zn}(\text{Me})_2]$  **6** dissolved in THF solution showing the emergence of a new  $\text{NMe}_2$  resonance (at 3 ppm) resulting from the metallation and subsequent  $\beta$ -elimination of DMPEA.
